# Supplementary material for: Nitric Oxide Synthase Genotype Modulation of Impulsivity and Ventral Striatal Activity in Adult ADHD Patients and Healthy Comparison Subjects
Source: Atypon-hosted journal article supplement (doi:10.1176/appi.ajp.2011.10101446), 2011-07-04
Supplement: ajp_168_10_1099_01.pdf [file ajp_168_10_1099_01.pdf]

### Supplementary data 1: Genotyping

DNA was isolated from EDTA blood samples. Genotyping of the Ex1f-VNTR was carried out at the department of Human Genetics of the Radboud University Nijmegen Medical Centre. PCR was performed with 1 µl 10x PCR buffer II (Applied Biosystems, Nieuwerkerk a/d IJssel, The Netherlands), 1 µl of 25 mM MgCl<sub>2</sub>, 1 µl dNTPs (2.5 mM of each dNTP; GE Healthcare, Zeist, The Netherlands), 0.50 µl forward and reverse primer together (10 pmol/µl of each primer, VIC<sup>®</sup>-labeled 5'-CCCTGCGTGGCTACTACTACATT-3' and 5'-CTGGGCTCCAAAGCATAACAT-3' with 'PIG'-tail; Applied Biosystems) and 0.08 µl AmpliTaq Gold polymerase (Applied Biosystems). The cycling conditions were: 12 min 95 °C, 10 amplification cycles of 30 sec at 94°C, 54°C for 30 sec and 72°C for 1 min, followed by 22 cycles of 30 sec at 89°C, 54°C for 30 sec and 1 min at 72°C, followed by a final 10 min at 72°C. After the PCR, fragment length analysis was performed on the ABI prism 3730 Genetic Analyser (Applied Biosystems) and results were analyzed with GeneMapper<sup>®</sup> Software, version 4.0 (Applied Biosystems). After testing for Hardy-Weinberg equilibrium<sup>1, 2</sup>, the resulting genotypes were converted to short (S) and long (L) alleles (see table below). The frequency of the dichotomous *NOS1* ex1f-VNTR genotype in Caucasian populations is as follows: SS=21.0%; SL=51.4%; LL=27.6% (n=7847 population-based subjects from Germany, Italy, Norway, Sweden, Estonia, Spain, The Netherlands and Austria) (Prof. Dr. A. Reif, personal communication).

#### *NOS1* Ex1f-VNTR<sup>a</sup>

| Short alleles      |             |             | Long alleles       |             |             |
|--------------------|-------------|-------------|--------------------|-------------|-------------|
| <i>Allele size</i> | <i>Reif</i> | <i>freq</i> | <i>Allele size</i> | <i>Reif</i> | <i>freq</i> |
| 138                | -           | 1           | 178                | 198         | 2           |
| 161                | 182         | 36          | 180                | 200         | 40          |
| 163                | 184         | 9           | 182                | 202         | 31          |
| 169                | 188         | 1           | 184                | 204         | 82          |
| 172                | 192         | 57          | 186                | 206         | 5           |
| 174                | 194         | 7           |                    |             |             |
| 176                | 196         | 1           |                    |             |             |

<sup>a</sup>Displayed are the size of the alleles found in the current study sample (*allele size*), the corresponding allele size from the study of Reif et al. 2009 (*Reif*) and frequency of these alleles in the current study sample (*freq*).

## References

1. Raymond, M. & Rousset, F. GENEPOP (version 1.2): population genetics software for exact tests and ecumenicism. *Journal of heredity* **86**, 248-249 (1995).
2. Rousset, F. GENEPOP '007: a complete re-implementation of the GENEPOP software for Windows and Linux. *Molecular Ecology Resources* **8**, 103-106 (2008).
