# Supplementary material for: Nitric Oxide Synthase Genotype Modulation of Impulsivity and Ventral Striatal Activity in Adult ADHD Patients and Healthy Comparison Subjects
Source: Atypon-hosted journal article supplement (doi:10.1176/appi.ajp.2011.10101446), 2011-07-04
Supplement: ajp_168_10_1099_03.pdf [file ajp_168_10_1099_03.pdf]

**Supplementary data 3** Brain regions more active for the ‘reward cue’ than the ‘no-reward cue’

| <b>Region</b>             | <b>Size</b> | <b>Side</b> | <b>T-value</b> | <b>x*</b> | <b>y*</b> | <b>z*</b> |
|---------------------------|-------------|-------------|----------------|-----------|-----------|-----------|
| Lateral prefrontal cortex | 67          | R           | 5.69           | 34        | 46        | 28        |
| Lateral prefrontal cortex | 131         | L           | 6.29           | -36       | 44        | 30        |
| Middle frontal gyrus      | 3407        | L           | 8.53           | -36       | -10       | 54        |
| Ventral Striatum          | 442         | R           | 6.45           | 14        | 4         | 2         |
| Ventral Striatum          | 281         | L           | 6.81           | -18       | 10        | -4        |
| Putamen                   | 76          | L           | 5.68           | -22       | -4        | 6         |
| Insula                    | 126         | R           | 6.59           | 36        | 28        | 4         |
| Insula                    | 115         | L           | 5.82           | -42       | 10        | 14        |

*Note:* displayed here are the results of a second level full factorial analysis in SPM5 with a cluster threshold of 35 voxels. The T-value represents the value for local maxima at  $p < .05$  (Family-wise-error corrected). \*x, y and z refer to MNI coordinates. Size=number of voxels, R=right, L=left.
